# Supplementary material
Source: publisher figshare collection journal article supplement (https://acs.figshare.com/ndownloader/files/21793230)
Supplement: Supplementary file 1 [file 21793230]

## Supporting Information

### **Interplay between Cocaine, Drug Removal, and Methylphenidate Reversal on Phospholipid Alterations in *Drosophila* Brain Determined by Imaging Mass Spectrometry**

Mai Hoang **Philipsen**<sup>†\*</sup>, Nhu T. N. **Phan**<sup>‡§</sup>, John S. **Fletcher**<sup>‡§</sup> and Andrew G. **Ewing**<sup>‡§</sup>

<sup>†</sup> Department of Chemistry and Chemical Engineering, Chalmers University of Technology, Gothenburg, Sweden

<sup>‡</sup> Department of Chemistry and Molecular Biology, University of Gothenburg, Gothenburg, Sweden

<sup>§</sup> The Gothenburg Imaging Mass Spectrometry (Go:IMS) Platform, Chalmers University of Technology and University of Gothenburg, Gothenburg, Sweden

**Supporting Information Table S1.** Assignment for selected peaks from fly brain in positive and negative ion modes.

|                   | Exact m/z | Measured m/z | $\Delta$ ppm | Label     | Species                 |
|-------------------|-----------|--------------|--------------|-----------|-------------------------|
| Positive ion mode | 713.4482  | 713.4501     | 2.7          | PC(32:0)  | [M+K-TMA] <sup>+</sup>  |
|                   | 721.4779  | 721.4802     | 3.2          | PC(34:2)  | [M+Na-TMA] <sup>+</sup> |
|                   | 732.5560  | 732.5485     | -2.0         | PC(32:1)  | [M+H] <sup>+</sup>      |
|                   | 734.5655  | 734.5621     | -4.6         | PC(32:0)  | [M+H] <sup>+</sup>      |
|                   | 739.4714  | 739.4668     | -6.2         | PC(34:1)  | [M+K-TMA] <sup>+</sup>  |
|                   | 749.5135  | 749.5154     | 2.5          | PC(36:2)  | [M+Na-TMA] <sup>+</sup> |
|                   | 758.5652  | 758.5626     | -3.4         | PC(34:2)  | [M+H] <sup>+</sup>      |
|                   | 760.5846  | 760.5809     | -4.9         | PC(34:1)  | [M+H] <sup>+</sup>      |
|                   | 765.4753  | 765.4693     | -7.8         | PC(36:2)  | [M+K-TMA] <sup>+</sup>  |
|                   | 770.5129  | 770.5096     | -4.3         | PC(32:1)  | [M+K] <sup>+</sup>      |
|                   | 772.5243  | 772.5218     | -3.2         | PC(32:0)  | [M+K] <sup>+</sup>      |
|                   | 780.5514  | 780.5464     | -6.4         | PC(34:2)  | [M+Na] <sup>+</sup>     |
|                   | 782.5612  | 782.5563     | -6.3         | PC(34:1)  | [M+Na] <sup>+</sup>     |
|                   | 784.5606  | 784.5568     | -4.8         | PC(34:0)  | [M+Na] <sup>+</sup>     |
|                   | 786.5809  | 786.5768     | -5.2         | PC(36:2)  | [M+H] <sup>+</sup>      |
|                   | 788.6209  | 788.6139     | -5.9         | PC(36:1)  | [M+H] <sup>+</sup>      |
|                   | 794.5063  | 794.5024     | -4.9         | PC(34:3)  | [M+K] <sup>+</sup>      |
|                   | 796.5218  | 796.5186     | -4.0         | PC(34:2)  | [M+K] <sup>+</sup>      |
|                   | 798.5396  | 798.5474     | -2.7         | PC(34:1)  | [M+K] <sup>+</sup>      |
|                   | 822.5410  | 822.5398     | -1.4         | PC(36:3)  | [M+K] <sup>+</sup>      |
|                   | 824.5513  | 824.5487     | -3.1         | PC(36:2)  | [M+K] <sup>+</sup>      |
|                   | 826.5702  | 826.5687     | -1.8         | PC(36:1)  | [M+K] <sup>+</sup>      |
|                   | 827.7099  | 827.7054     | -5.4         | TAG(48:1) | [M+Na] <sup>+</sup>     |
|                   | 841.7256  | 841.7208     | -5.7         | TAG(48:2) | [M+K] <sup>+</sup>      |
|                   | 843.7412  | 843.7439     | 3.2          | TAG(48:1) | [M+K] <sup>+</sup>      |
|                   | 853.7256  | 853.7208     | -5.6         | TAG(50:2) | [M+Na] <sup>+</sup>     |
|                   | 855.7412  | 855.7358     | -6.3         | TAG(50:1) | [M+Na] <sup>+</sup>     |
|                   | 871.7225  | 871.7186     | -4.5         | TAG(50:1) | [M+K] <sup>+</sup>      |
|                   | 879.7412  | 879.7376     | -4.1         | TAG(52:3) | [M+Na] <sup>+</sup>     |
|                   | 881.7569  | 881.7535     | -3.8         | TAG(52:2) | [M+Na] <sup>+</sup>     |
|                   | 883.7725  | 883.7697     | -3.2         | TAG(52:1) | [M+Na] <sup>+</sup>     |
| Negative ion mode | 253.2173  | 253.2185     | 4.7          | FA(16:1)  | [M-H] <sup>-</sup>      |
|                   | 255.2330  | 255.2347     | 6.7          | FA(16:0)  | [M-H] <sup>-</sup>      |
|                   | 279.2330  | 279.2346     | 5.7          | FA(18:2)  | [M-H] <sup>-</sup>      |
|                   | 281.2486  | 281.2497     | 3.9          | FA(18:1)  | [M-H] <sup>-</sup>      |
|                   | 283.2643  | 283.2657     | 4.9          | FA(18:0)  | [M-H] <sup>-</sup>      |
|                   | 339.3269  | 339.3287     | 5.3          | FA(22:0)  | [M-H] <sup>-</sup>      |
|                   | 367.3582  | 367.3602     | 5.4          | FA(24:0)  | [M-H] <sup>-</sup>      |
|                   | 435.2517  | 435.2533     | 3.7          | LPA(18:1) | [M-H] <sup>-</sup>      |
|                   | 478.2939  | 478.2965     | 5.4          | LPE(18:1) | [M-H] <sup>-</sup>      |
|                   | 597.3045  | 597.3081     | 6.0          | LPI(18:1) | [M-H] <sup>-</sup>      |
|                   | 660.4567  | 660.4534     | -5.0         | PE(30:1)  | [M-H] <sup>-</sup>      |
|                   | 688.4878  | 688.4831     | -6.8         | PE(32:1)  | [M-H] <sup>-</sup>      |
|                   | 714.5053  | 714.4998     | -7.7         | PE(34:2)  | [M-H] <sup>-</sup>      |
|                   | 716.5223  | 716.5201     | -3.1         | PE(34:1)  | [M-H] <sup>-</sup>      |
|                   | 740.5236  | 740.5195     | -5.5         | PE(36:3)  | [M-H] <sup>-</sup>      |
|                   | 742.5382  | 742.5334     | -6.5         | PE(36:2)  | [M-H] <sup>-</sup>      |
|                   | 833.5149  | 833.5125     | -2.9         | PI(34:2)  | [M-H] <sup>-</sup>      |
|                   | 835.5298  | 835.5298     | -6.0         | PI(34:1)  | [M-H] <sup>-</sup>      |
|                   | 837.6070  | 837.5989     | -2.4         | PI(34:0)  | [M-H] <sup>-</sup>      |
|                   | 855.5041  | 855.5015     | -3.0         | PI(36:5)  | [M-H] <sup>-</sup>      |
|                   | 857.5148  | 857.5098     | -5.8         | PI(36:4)  | [M-H] <sup>-</sup>      |
|                   | 859.5342  | 859.5295     | -5.5         | PI(36:3)  | [M-H] <sup>-</sup>      |

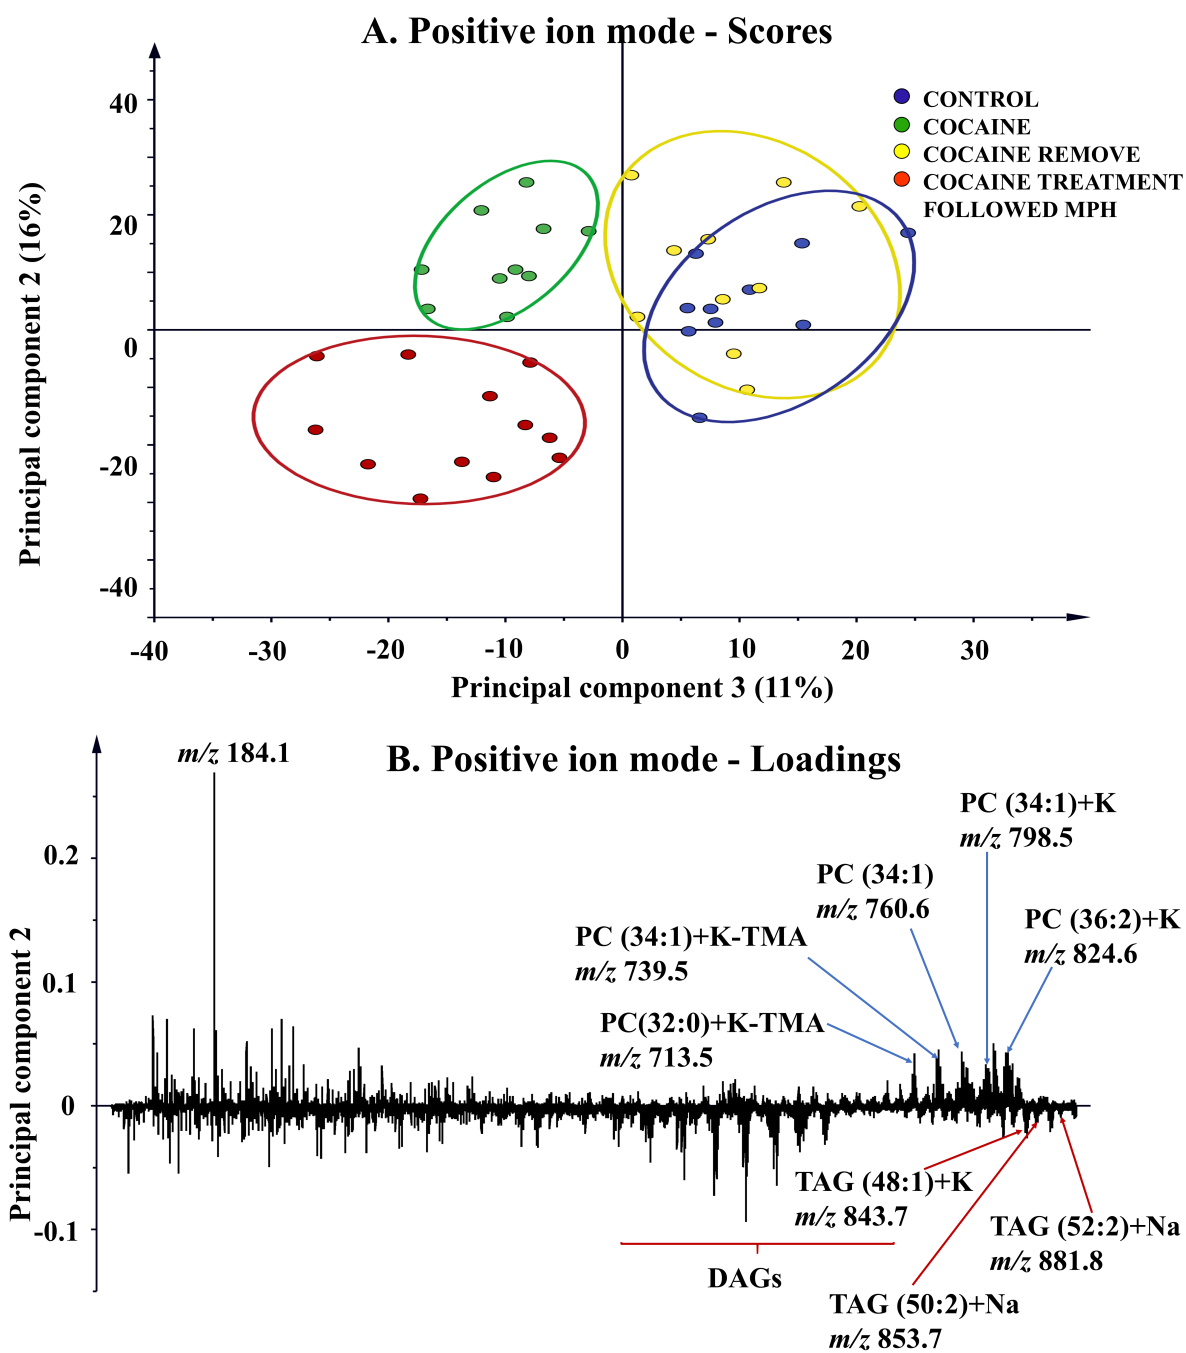

**Supporting Information Figure S1.** PCA analysis for ToF-SIMS data in positive mode; (A) Scores plot of the second principal component versus the third principal component; (B) Corresponding loadings for the second principal component for ToF-SIMS data in positive mode.

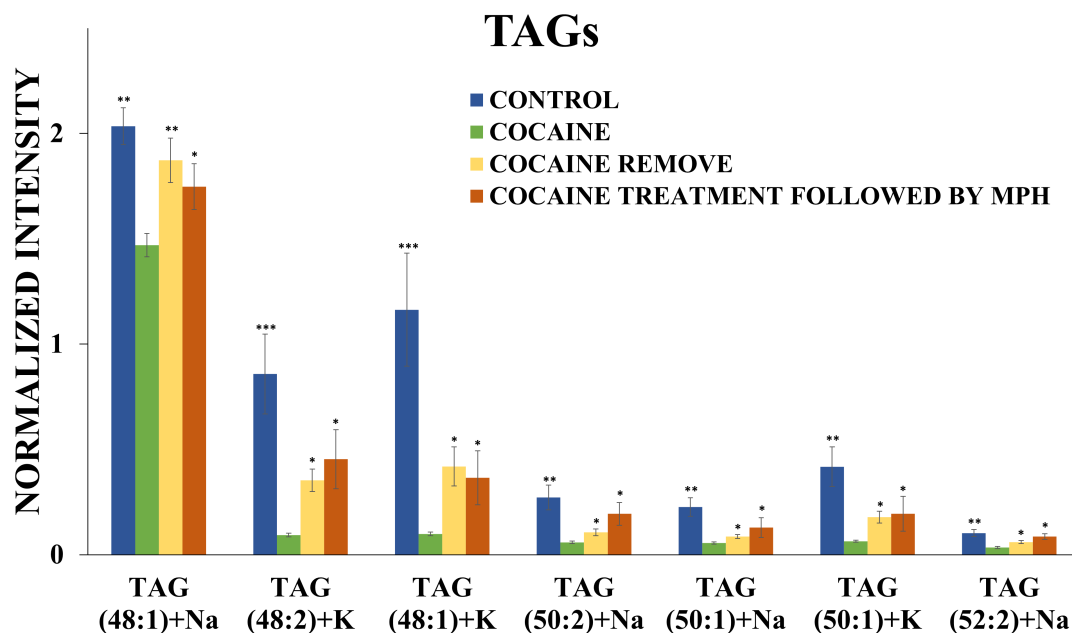

**Supporting Information Figure S2.** Alteration of TAG levels in the central fly brain after cocaine, cocaine removal, and flies with cocaine treatment followed MPH oral administration in positive ion mode analyzed using a 40 keV  $(\text{CO}_2)_{6000}^+$  GCIB. Peak intensity is normalized to number of pixels selected and total peak intensity. Error bars is the standard error of the mean of 33 controls (blue bars), 28 cocaine-treated flies (green bars), 27 flies with cocaine withdrawal (yellow bars), and 27 flies with MPH feeding after cocaine withdrawal (red bars). *t-test* is applied to identify the statistic difference between cocaine-treated group and others (\* $p < 0.05$ , \*\* $p < 0.01$ , \*\*\* $p < 0.001$ ).

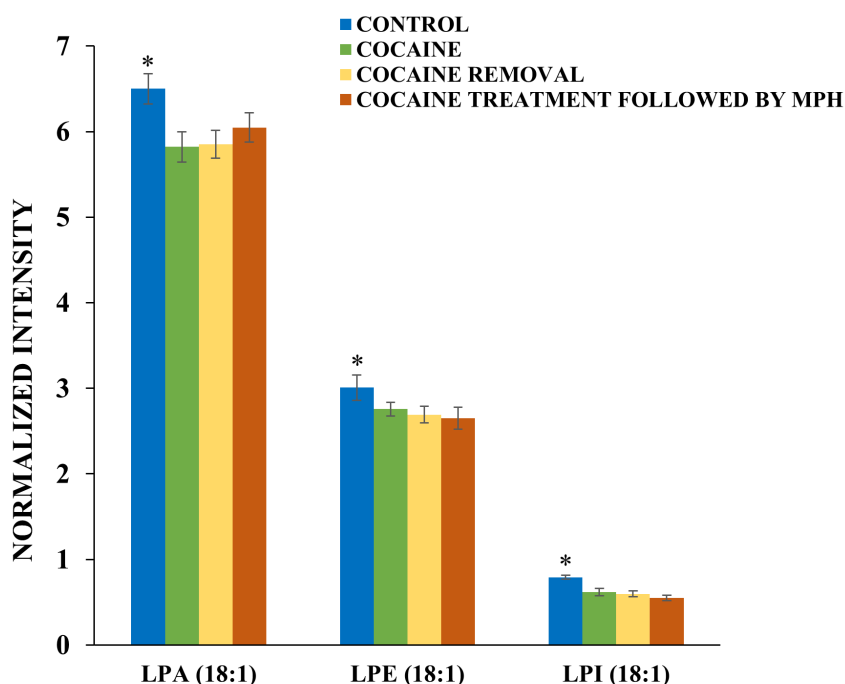

**Supporting Information Figure S3.** The relative amounts of lysophospholipids in the central fly brain after cocaine, cocaine removal, and flies with cocaine treatment followed MPH oral administration in negative ion mode analyzed using a 40 keV  $(\text{CO}_2)_{6000}^+$  GCIB. (A) PE levels; (B) PI levels. Peak intensity is normalized to number of pixels selected and total peak intensity. Error bars is the standard error of the mean of 32 controls (blue bars), 24 cocaine-treated flies (green bars), and 26 flies with cocaine withdrawal (yellow bars), and 24 flies fed with cocaine followed by MPH. *t-test* is applied to identify the statistic difference between cocaine-treated group and others (\* $p < 0.05$ ). There is no statistic difference between cocaine group and cocaine removal group, as well as cocaine-treated followed by MPH group ( $p > 0.05$ ).

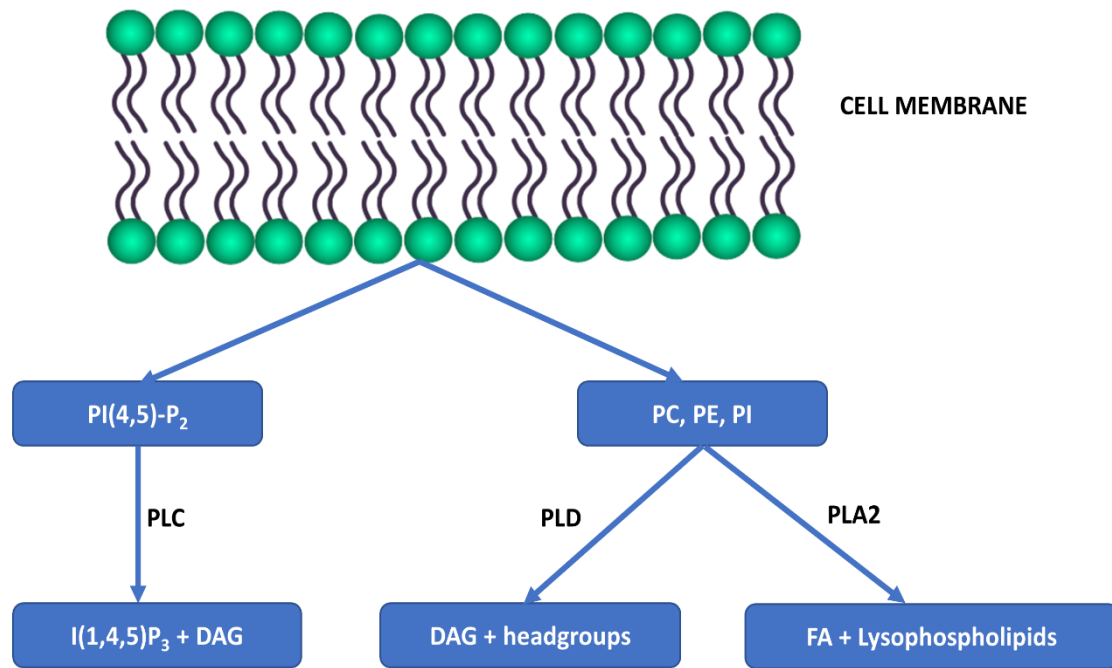

**Supporting Information Figure S4. Scheme showing the degradation of membrane phospholipids by phospholipase A<sub>2</sub>, C, and D (PLA<sub>2</sub>, PLC, and PLD).** PI(4,5)P<sub>2</sub>, phosphatidylinositol 4,5-bisphosphate; I(1,4,5)P<sub>3</sub>, inositol 1,4,5-trisphosphate; DAG, diacylglycerol; PC, phosphatidylcholine; PE, phosphatidylethanolamine; PI, phosphatidylinositol.
